# Supplementary material
Source: MDPI journal article supplement (https://www.mdpi.com/2073-4441/13/10/1393)
Supplement: s1 [file s1]

# Supplementary Material

Table S1. Validation parameters and information about the chromatographic method

| Compounds | Linearity<br>(mg L <sup>-1</sup> ) | R <sup>2</sup> | RSD (%) (n = 3) |                 | Recovery (n = 3)<br>(%) |
|-----------|------------------------------------|----------------|-----------------|-----------------|-------------------------|
|           |                                    |                | Repeatability   | Reproducibility |                         |
| MeP       | 0.05 - 1                           | 0.9977         | 2.9             | 7.8             | 62                      |
| EtP       | 0.01 - 1                           | 0.9988         | 2.0             | 4.0             | 47                      |
| PrP       | 0.01 - 1                           | 0.9985         | 1.6             | 3.3             | 75                      |
| BuP       | 0.02 - 1                           | 0.9988         | 1.2             | 4.8             | 64                      |
| TCS       | 0.02 - 1                           | 0.9987         | 1.4             | 3.9             | 60                      |
| FEN       | 0.01 - 1                           | 0.9949         | 3.2             | 5.7             | 72                      |
| GEM       | 0.02 - 1                           | 0.9983         | 1.5             | 4.9             | 76                      |

R<sup>2</sup> - regression coefficient; RSD - relative standard deviation;

Table S2. Samples properties – Temperature, pH, and conductivity

| Hour  | Temperature |       | pH   |      | Conductivity |        |
|-------|-------------|-------|------|------|--------------|--------|
|       | BA-U        | BA-D  | BA-U | BA-D | BA-U         | BA-D   |
| 7:00  | 13.20       | 13.30 | 7.16 | 7.48 | 269.00       | 298.00 |
| 9:00  | 13.13       | 13.57 | 7.20 | 7.26 | 276.00       | 293.67 |
| 11:00 | 13.97       | 14.60 | 7.93 | 7.56 | 268.33       | 308.00 |
| 13:00 | 15.27       | 15.77 | 7.80 | 7.81 | 277.67       | 301.33 |
| 15:00 | 16.13       | 16.57 | 7.86 | 7.81 | 287.67       | 359.33 |
| 17:00 | 15.93       | 16.20 | 7.78 | 7.58 | 284.67       | 342.33 |
| 19:00 | 15.23       | 15.57 | 7.88 | 7.87 | 277.33       | 333.33 |
| 21:00 | 14.50       | 15.00 | 7.33 | 6.88 | 270.33       | 329.00 |
| 23:00 | 14.03       | 14.67 | 7.31 | 7.04 | 267.33       | 325.33 |
| 1:00  | 13.73       | 14.27 | 7.46 | 7.48 | 264.33       | 308.00 |
| 3:00  | 13.47       | 14.07 | 7.43 | 7.35 | 263.00       | 301.67 |
| 5:00  | 13.37       | 13.80 | 7.68 | 7.54 | 263.00       | 292.00 |

Table S3. Samples properties – Turbidity, DO, TDS and salinity

| Hour  | Turbidity |       | DO   |      | TDS    |        | Salinity |      |
|-------|-----------|-------|------|------|--------|--------|----------|------|
|       | BA-U      | BA-D  | BA-U | BA-D | BA-U   | BA-D   | BA-U     | BA-D |
| 7:00  | 22.50     | 17.90 | 5.40 | 5.16 | 173.00 | 186.00 | 0.17     | 0.18 |
| 9:00  | 16.63     | 16.70 | 5.44 | 5.10 | 177.00 | 186.33 | 0.17     | 0.18 |
| 11:00 | 27.83     | 22.30 | 5.08 | 4.26 | 169.67 | 191.00 | 0.16     | 0.18 |
| 13:00 | 32.10     | 37.30 | 5.40 | 4.16 | 170.67 | 203.00 | 0.16     | 0.19 |
| 15:00 | 32.77     | 52.23 | 5.65 | 3.88 | 173.33 | 214.00 | 0.17     | 0.21 |
| 17:00 | 35.67     | 40.70 | 5.10 | 4.31 | 172.00 | 204.67 | 0.17     | 0.20 |
| 19:00 | 32.93     | 41.33 | 4.60 | 3.86 | 170.00 | 203.33 | 0.16     | 0.20 |
| 21:00 | 37.50     | 43.03 | 4.82 | 4.58 | 169.00 | 203.00 | 0.16     | 0.20 |
| 23:00 | 36.53     | 49.83 | 4.79 | 4.58 | 168.67 | 202.67 | 0.16     | 0.20 |
| 1:00  | 60.80     | 60.00 | 5.34 | 4.84 | 168.00 | 194.33 | 0.16     | 0.19 |
| 3:00  | 47.60     | 68.13 | 5.20 | 4.71 | 166.00 | 191.33 | 0.16     | 0.19 |
| 5:00  | 56.67     | 68.23 | 4.90 | 5.33 | 168.33 | 185.00 | 0.16     | 0.18 |

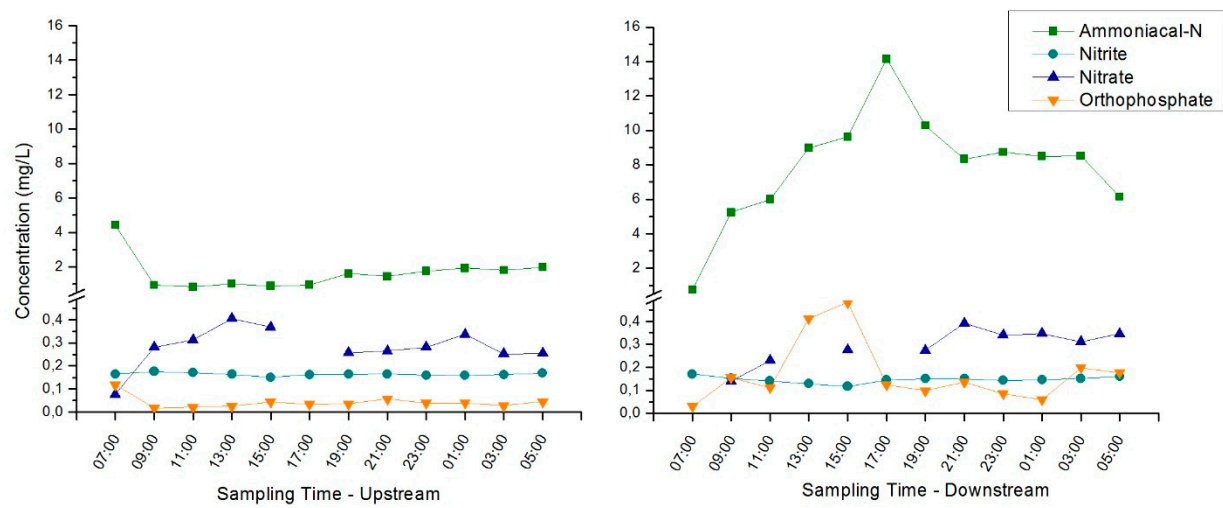

Figure S1 – Nutrients concentrations
